# Supplementary material for: The Requirement for US28 During Cytomegalovirus Latency Is Independent of US27 and US29 Gene Expression
Source: PubMed Central journal article supplement (PMC7198828; doi:10.3389/fcimb.2020.00186), 2020-04-28
Supplement: Data_Sheet_1.pdf [file Data_Sheet_1.pdf]

## *Supplementary Material*

### **The Requirement For US28 During Cytomegalovirus Latency Is Independent Of US27 And US29 Gene Expression**

**Benjamin A. Krishna<sup>1§</sup>, Amanda B. Wass<sup>1§</sup>, Rajashri Sridharan<sup>1</sup>, Christine M. O'Connor<sup>1\*</sup>**

#### **1 Supplementary Data**

Supplementary Tables: 1

Supplementary Figures: 3

**Supplementary Table 1.** Oligonucleotides used in this study.

| Primer Use                                           | Primer Direction     | Primer Sequence                                                                                        |
|------------------------------------------------------|----------------------|--------------------------------------------------------------------------------------------------------|
| <b>3xF-Kan-frt insertion</b>                         | forward <sup>§</sup> | TCTTCCGACACGCTGTCCGACGAGGTGTGTCGCGTCTCACAAATTATACCGTTAGATTATAAAGATGATGATGATAAA                         |
|                                                      | reverse <sup>§</sup> | AGAGGGGGCGGACACGGGGTTTGTATGAAAAGGCCGAGGTAGCGCTTTTTAGGCCGCGGAATTCGAAGTT                                 |
| <b><i>galK</i> insertion</b>                         | forward <sup>¶</sup> | GCACCGAGGGCAGAACTGGTGCTATCATGACACCGACGACGACGACC<br>GCGcctgttgacaattaatcatcgga                          |
|                                                      | reverse <sup>¶</sup> | TGAAAACACAAGGAGTCGCGTCTTCATCGTAGTCAAACCTCCGTCGTGAGTTcagcactgtcctgctcct                                 |
| <b><i>galK</i> reversion oligo</b>                   | top                  | CACCGAGGGCAGAACTGGTGCTATCATGACACCGACGACGACGACCGCGTAACTCACGACGGAGTTTGACTACGATGAAGACGCGACTCCTTGTGTTTT    |
|                                                      | bottom               | AAAACACAAGGAGTCGCGTCTTCATCGTAGTCAAACCTCCGTCGTGAGTTACGCGGTTCGTCGTCGTCGGTGTTCATGATAGCACCAGTTCTGCCCTCGGTG |
| <b>Multi-tag vGPCR virus – <i>galK</i> insertion</b> |                      |                                                                                                        |
| UL33-c-myc                                           | forward <sup>¶</sup> | ACAAAAATCCCCCATCGACTCTCACAATCGCATCATAACCTCAGCGGGGTAcctgttgacaattaatcatcgga                             |
|                                                      | reverse <sup>¶</sup> | AAATGGCGACGGGTTCTGGTGCTTTCTGAATAAAGTAACAGGAAAGCTCAcagcactgtcctgctcct                                   |
| UL78-V5                                              | forward <sup>¶</sup> | TGCACCGACGGCGAAAACACCGTCGCGTCCGACGCAACGGTGACGGCATTAcctgttgacaattaatcatcgga                             |
|                                                      | reverse <sup>¶</sup> | GTGATTTATCTGCCACTTTTCTCCCCGCTGCCGTACAGCGCCGCCGCTCAcagcactgtcctgctcct                                   |
| US27-3xHA                                            | forward <sup>¶</sup> | TATGACAGAAAAAATGCACCTATGGAGTCCGGGGAGGAGGAATTTCTATTGcctgttgacaattaatcatcgga                             |

|                                                                                |                      |                                                                                                                                                                                                    |
|--------------------------------------------------------------------------------|----------------------|----------------------------------------------------------------------------------------------------------------------------------------------------------------------------------------------------|
|                                                                                | reverse <sup>¶</sup> | CAATGAGCAAAAATAGATGTGCGGCGGACGCGTGAAAGAGGATCGAA<br>TTAtcagcactgtcctgctcctt                                                                                                                         |
| <b>Multi-tag vGPCR virus – <i>galK</i> reversion gBlocks</b>                   |                      |                                                                                                                                                                                                    |
| UL33-c-myc                                                                     |                      | ACAAAAATCCCCCATCGACTCTCACAATCGCATCATAACCTCAGCGGG<br>GTAGAACAAAACTTATTTCTGAAGAAGATCTTTGAGCTTTCCTGTTAC<br>TTTATTAGAAAAGCACCAGAACCCTGCGCCATT                                                          |
| UL78-V5                                                                        |                      | TGCACCGACGGCGAAAACACCGTCGCGTCCGACGCAACGGTGACGGC<br>ATTAGGTAAGCCTATCCCTAACCCCTCCTCGGTCTCGATTCTACGTGA<br>GCGGCGGCGCTGTACGGCAGCGGGGAGAAAAGTGGCAGATAAATCAC                                             |
| US27-3xHA                                                                      |                      | TATGACAGAAAAAATGCACCTATGGAGTCCGGGGAGGAGGAATTTCT<br>ATTGTACCCATATGACGTTCCAGACTACGCGTATCCGTACGACGTTCC<br>GGATTACGCTTACCCTTACGACGTACCTGACTACGCTTAATTCGATCCT<br>CTTTCACGCGTCCGCCGCACATCTATTTTTGCTCATTG |
| <b>Multi-tag vGPCR virus – <i>galK</i> reversion gBlock amplifying primers</b> |                      |                                                                                                                                                                                                    |
| UL33-c-myc                                                                     | forward              | ACAAAAATCCCCCATCGACTC                                                                                                                                                                              |
|                                                                                | reverse              | AAATGGCGACGGGTTCTGGTG                                                                                                                                                                              |
| UL78-V5                                                                        | forward              | TGCACCGACGGCGAAAACACC                                                                                                                                                                              |
|                                                                                | reverse              | GTGATTTATCTGCCACTTTTC                                                                                                                                                                              |
| US27-3xHA                                                                      | forward              | TATGACAGAAAAAATGCACCT                                                                                                                                                                              |
|                                                                                | reverse              | CAATGAGCAAAAATAGATGTG                                                                                                                                                                              |
| <b>RTqPCR</b>                                                                  |                      |                                                                                                                                                                                                    |
| US27                                                                           | forward              | CCGTATGGTGCGGTTTATCATTA                                                                                                                                                                            |
|                                                                                | reverse              | CTAAAAATAGCGCCAGGTTGAAAGG                                                                                                                                                                          |
| US28                                                                           | forward              | CCAGAATCGTTGCGGTGTCTCAGT                                                                                                                                                                           |
|                                                                                | reverse              | CGTGTCCACAAACAGCGTCAGGT                                                                                                                                                                            |
| US29                                                                           | forward              | CGACGAGACAACAATGAC                                                                                                                                                                                 |

|       |         |                                 |
|-------|---------|---------------------------------|
|       | reverse | <u>AATTGACGGTCCACTGAG</u>       |
| UL123 | forward | <u>GCCTTCCCTAAGACCACCAAT</u>    |
|       | reverse | <u>ATTTTCTGGGCATAAGCCATAATC</u> |
| UL99  | forward | <u>GTGTCCCATTCCC</u> GACTCG     |
|       | reverse | TTCACAACGTCCACCCACC             |
| GAPDH | forward | <u>ACCCACTCCTCCACCTTTGAC</u>    |
|       | reverse | <u>CTGTTGCTGTAGCCAAATTCGT</u>   |

<sup>§</sup> Underlined sequences are complementary to the pKan-fit template.

<sup>¶</sup> Lowercase sequences are complementary to the pGalK template.

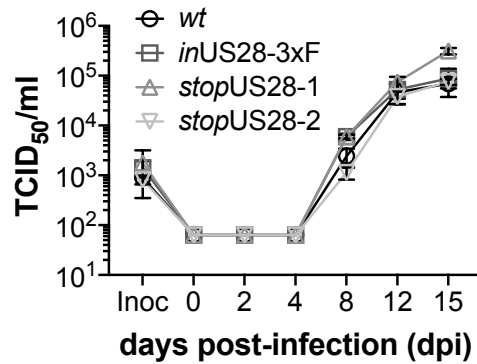

**Supplementary Figure 1. US28 recombinant viruses display wild type growth kinetics in lytically-infected primary fibroblasts.** MRC-5 cells were infected as indicated (moi = 0.01). Supernatants from each culture were collected at the indicated days post-infection (dpi). Infectious virus was quantified by TCID<sub>50</sub> on naïve fibroblasts. Inoc, inoculum. All samples were analyzed in triplicate. Error bars indicate standard deviation, and statistical significance was calculated using two-way ANOVA analyses followed by Tukey's post-hoc analyses. Values were not statistically significant.

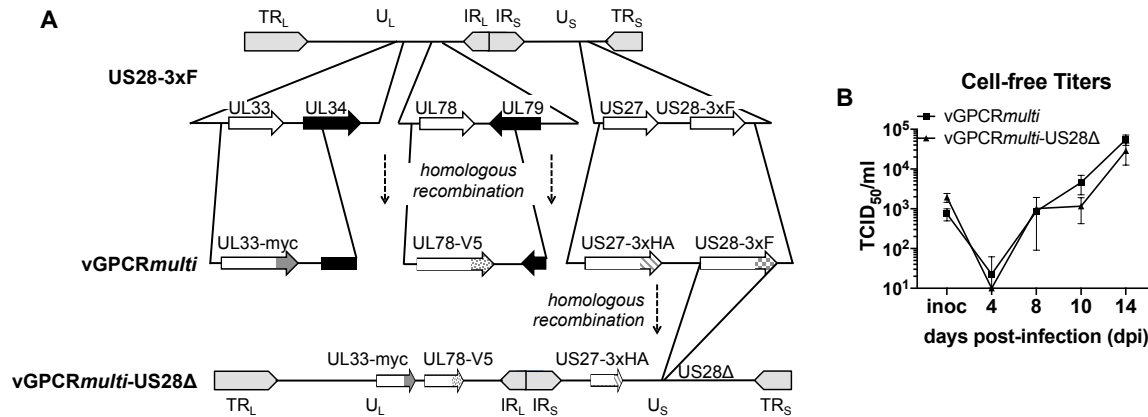

**Supplementary Figure 2. TB40/*EmCherry*-vGPCR*multi* and- vGPCR*multi*-US28Δ replicate to wild type titers in lytically infected fibroblasts. (A)** TB40/*EmCherry*-US28-3xF (Miller et al., 2012) was used to generate TB40/*EmCherry*-vGPCR*multi* (vGPCR*multi*), containing epitope tags on each additional vGPCR, as depicted. vGPCR*multi* was subsequently used to generate vGPCR*multi*-US28Δ, which lacks the entire US28 ORF, inclusive of the triple FLAG epitope tag. **(B)** Multi-step growth analyses of the viral recombinants in **(A)** was evaluated in lytically infected NuFF-1 fibroblasts (moi = 0.01). At the indicated times post-infection, infectious supernatants were collected, and titers were determined using TCID<sub>50</sub> assay on naïve NuFF-1 fibroblasts in triplicate. Inoc, inoculum. Error bars indicate standard deviation, and statistical significance was calculated using two-way ANOVA with Sidak's post-hoc analysis. Values were not statistically significant.

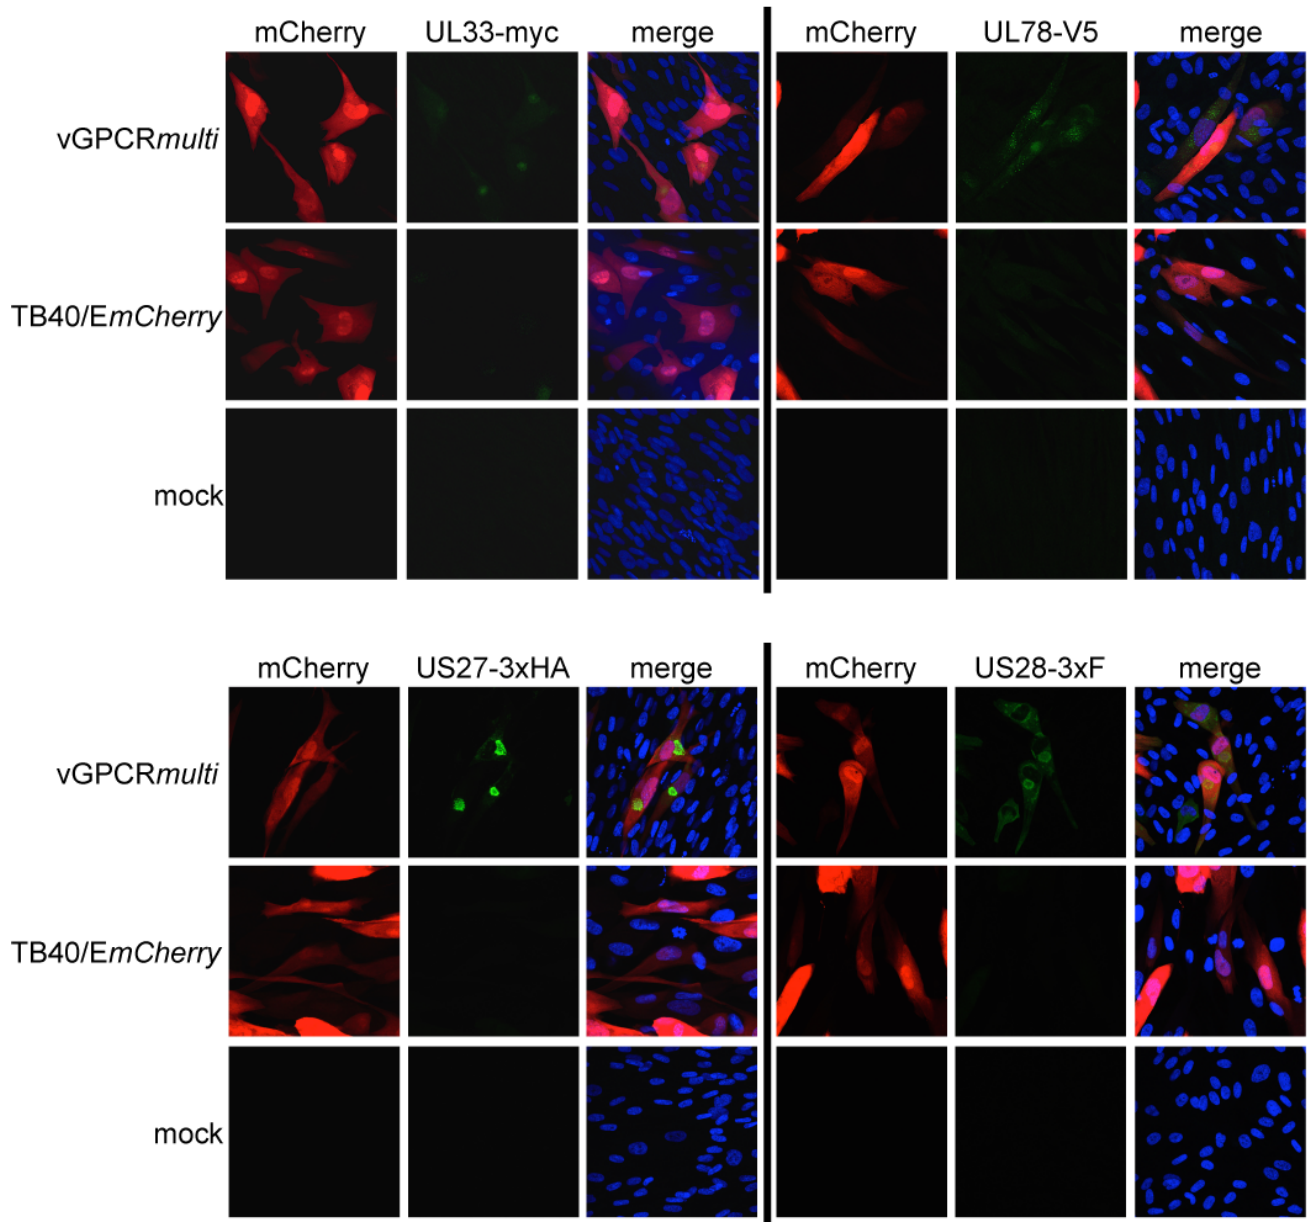

**Supplementary Figure 3. TB40/*EmCherry*-*vGPCRmulti* expresses each vGPCR following lytic infection.** NuFF-1 fibroblasts were mock-infected or lytically infected (moi = 0.5) as shown and harvested 96 hpi for IFA. The appropriate antibodies were used to detect the indicated epitope tag (see Materials and Methods for specific antibody details): UL33 (anti-myc), UL78 (anti-V5), US27 (anti-HA), US28 (anti-FLAG), each shown in green. mCherry (red) is a marker of infection, and nuclei were visualized with DAPI (blue). Images were acquired with a 40x objective with 1.5x magnification. Representative images are shown (n=3).
